# 1 **Phylogenomic Insights into the Origin of Primary Plastids**

2

3 Iker Irisarri<sup>1,2,3,\*</sup>, Jürgen F. H. Strassert<sup>1,4</sup>, Fabien Burki<sup>1,5</sup>

4

5 <sup>1</sup> *Department of Organismal Biology (Systematic Biology), Uppsala University, Norbyv.*

6 *18D, 75236 Uppsala, Sweden*

7 <sup>2</sup> *Department of Biodiversity and Evolutionary Biology, Museo Nacional de Ciencias*

8 *Naturales, José Gutiérrez Abascal 2, 28006 Madrid, Spain*

9 <sup>3</sup> *Current address: Department of Applied Bioinformatics, Institute for Microbiology*

10 *and Genetics, University of Göttingen, Goldschmidtstr. 1, Göttingen, Germany*

11 <sup>4</sup> *Department of Biology, Chemistry, and Pharmacy, Institute of Biology, Evolutionary*

12 *Biology, Free University of Berlin, Königin-Luise-Str. 1–3, 14195 Berlin, Germany*

13 <sup>5</sup> *Science For Life Laboratory, Uppsala University, 75236 Sweden*

14

15 \* Email: [irisarri.iker@gmail.com](mailto:irisarri.iker@gmail.com)

16

17 **Abstract**

18

19 The origin of plastids was a major evolutionary event that paved the way for an  
20 astonishing diversification of photosynthetic eukaryotes. Plastids originated by  
21 endosymbiosis between a heterotrophic eukaryotic host and a cyanobacterium,  
22 presumably in a common ancestor of all primary photosynthetic eukaryotes  
23 (Archaeplastida). A single origin of primary plastids is well supported by plastid  
24 evidence but not by nuclear phylogenomic analyses, which have consistently failed to  
25 recover the monophyly of Archaeplastida hosts. Importantly, the monophyly of both  
26 plastid and host (nuclear) genomes is required to support a single ancestral  
27 endosymbiosis, whereas non-monophyletic hosts could be explained under scenarios of  
28 independent or serial eukaryote-to-eukaryote endosymbioses. Here, we assessed the  
29 strength of the signal for the Archaeplastida host monophyly in four available  
30 phylogenomic datasets. The effect of phylogenetic methodology, data quality,  
31 alignment trimming strategy, gene and taxon sampling, and the presence of outlier  
32 genes loci were investigated. Our analyses revealed a general lack of support for host  
33 monophyly in the shorter individual datasets. However, when analyzed together under  
34 rigorous data curation and complex mixture evolutionary models, the combined dataset  
35 consistently recovered the monophyly of Archaeplastida hosts. This study represents an  
36 important step towards better understanding the eukaryotic evolution and the origin of  
37 plastids.

38

39 **Keywords:** Archaeplastida, Bayesian, chloroplast, maximum likelihood, mixture  
40 model, outlier loci, paralog, protist

41

## 42 **Introduction**

43

44 The origin of plastids by endosymbiosis with cyanobacteria was a key evolutionary  
45 event that allowed eukaryotes to perform oxygenic photosynthesis (i.e.,  
46 photoautotrophy). This innovation paved the way for an astonishing diversification of  
47 micro- and macroscopic algae and land plants in all sunlit environments. Generally,  
48 plastids have been viewed to originate from a single endosymbiotic event in a common  
49 ancestor of three well-defined lineages: Glaucophyta, Rhodophyta (red algae), and  
50 Chloroplastida (green algae and land plants), collectively known as Archaeplastida (Adl  
51 et al. 2005) or Plantae (Cavalier-Smith 1998). These lineages harbor primary plastids,  
52 i.e. derived by endosymbiosis directly from cyanobacteria, and thereafter will be  
53 referred to as primary photosynthetic eukaryotes (PPE). Despite structural and genomic  
54 differences, the plastids of Glaucophyta, Rhodophyta, and Chloroplastida share many  
55 similarities such as homologous protein transport apparatus, gene content, and synteny  
56 blocks that have been interpreted as evidence supporting their common origin (Cavalier-  
57 Smith 2000; Löffelhardt 2014; Mackiewicz and Gagat 2014). Furthermore, these  
58 observations are consistent with the monophyly of PPE generally recovered in plastid  
59 phylogenies.

60 Unlike plastid phylogenies, resolving the relationship among host (nuclear)  
61 lineages has proven more difficult and the question of the monophyly of Archaeplastida  
62 currently stands out as one of the major knowledge gaps in the eukaryotic Tree of Life  
63 (Burki et al. 2020). This is because inferring the relationships among PPE necessarily  
64 involves resolving the relationships among other deep-branching eukaryotic groups  
65 such as Cryptophyta or Haptophyta, all notoriously difficult to place in the eukaryotic  
66 tree (Burki et al. 2020). With a few exceptions (Lax et al. 2018; Price et al. 2019), the

67 majority of nuclear phylogenomic studies have not recovered the monophyly of PPE  
68 (Hampl et al. 2009; Baurain et al. 2010; Parfrey et al. 2010; Burki et al. 2012, 2016;  
69 Brown et al. 2013; Yabuki et al. 2014; Janouškovec et al. 2017), or did so with low  
70 statistical support (Burki et al. 2007, 2009), or using a very sparse taxon sampling  
71 (Rodríguez-Ezpeleta et al. 2005, 2007a; Deschamps and Moreira 2009). Recent studies  
72 reported contradicting Bayesian and maximum likelihood trees regarding  
73 Archaeplastida monophyly (Brown et al. 2018; Gawryluk et al. 2019; Strasser et al.  
74 2019). Importantly, the majority of studies that did not to recover monophyletic PPE did  
75 not converge to a robust alternative topology either, leading to the current situation  
76 where the monophyly of Archaeplastida is clear from plastids but inconclusive from  
77 host data.

78         While cell biological and genomic characters in primary plastids are more easily  
79 explained under the hypothesis of a single endosymbiosis, the observed similarities  
80 could at face value be the result of parallel or convergent evolution (Stiller 2014). In  
81 fact, the monophyly of plastids is a necessary but insufficient condition to invoke a  
82 single endosymbiosis in the ancestor of Archaeplastida. Alternative biological scenarios  
83 can explain plastid monophyly when hosts are not monophyletic, including (i) serial  
84 endosymbioses or (ii) the independent acquisition of plastids from closely-related (and  
85 now extinct) cyanobacterial lineages (Supplementary Fig. 1; Mackiewicz and Gagat  
86 2014). Therefore, the common origin of primary plastids in the ancestor of PPE can  
87 only be hypothesized if both plastid and host lineages are shown to be monophyletic.

88         Here, we assessed the evidence for the monophyly of Archaeplastida by  
89 investigating the signal and conflict in four available nuclear phylogenomic datasets.  
90 After correcting for systematic biases, none of the datasets supported the monophyly of  
91 Archaeplastida, showing only diverse and weakly supported relationships. In search for

92 the reasons of this lack of signal, we investigated the effects of phylogenetic inference  
93 methods and models, gene sampling, taxon sampling, and the presence of outlier loci.  
94 To overcome the limitations observed in the four source datasets, we generated six  
95 combined datasets after rigorous data curation and investigated the effect of data  
96 quality, systematic errors (model misspecifications), and the effect of alignment  
97 trimming algorithms in recovering deep eukaryotic relationships. When analyzed under  
98 complex mixture models, the combined datasets provided a congruent hypothesis for  
99 deep eukaryotic relationships with monophyletic Archaeplastida.

100

## 101 **Materials and Methods**

102

### 103 *Published Phylogenomic Datasets*

104

105 We chose four published representative datasets that were assembled independently:  
106 (Baurain et al. 2010; BAU), (Brown et al. 2013; BRO), (Katz and Grant 2015; KAT),  
107 (Burki et al. 2016; BUR). All datasets consisted on concatenated protein alignments,  
108 except for KAT that additionally contained the 18S rRNA gene. In KAT, protein and  
109 DNA alignments were analyzed both jointly and independently. All datasets were taken  
110 “as-is” from the original authors with minimal intervention to standardize taxonomic  
111 names. Because the concatenated alignment in KAT did not retain gene boundary  
112 information, we re-created the protein dataset following their published protocol: the  
113 eukaryotic-only gene alignments provided by the authors  
114 (<https://datadryad.org/resource/doi:10.5061/dryad.db78g.2/13.2>) were subsampled for  
115 the 231 eukaryotic taxa and 149 protein alignments used in their final tree (Fig. 1 of  
116 Katz and Grant [2015]) and alignment columns with >50% missing data were removed,

117 followed by concatenation. The completeness of all four datasets was assessed with  
118 AliStat v.1.11 (Wong et al. 2014) using four recently proposed metrics (Wong et al.  
119 2020).

120

### 121 *Maximum Likelihood Re-analysis*

122

123 To account for the effect of inference methods and models used in the original studies,  
124 the four datasets were analyzed under equivalent conditions: maximum likelihood (ML)  
125 under best-fit site-homogeneous (LG+F+ $\Gamma$ 4) and site-heterogeneous  
126 (LG+C40/C60+F+ $\Gamma$ 4) models using IQTREE v.1.5.4 (Nguyen et al. 2015). Best-fit  
127 models were selected with ModelFinder (Kalyaanamoorthy et al. 2017) and branch  
128 support was assessed with 1,000 pseudo-replicates of ultrafast bootstrapping (UFBoot;  
129 Hoang et al. 2017). The two shorter datasets (BAU, BRO) used the C40 empirical  
130 mixture to avoid overparameterization (increasing the number of profiles was not  
131 supported because some profiles had zero weights).

132

### 133 *Comparison of Gene and Taxon Sampling Across Datasets*

134

135 The effect of gene and taxon sampling was assessed by comparing ML trees from data  
136 subsets of shared genes and taxa across datasets. We considered all six possible  
137 pairwise gene and taxon overlaps between datasets plus a seventh one as the intersection  
138 of all four. To identify shared genes, we standardized gene names to that of the human  
139 ortholog, which was identified by BLASTP against all human proteins (GRCh38.p7;  
140 ENSEMBL 87) using human (or metazoan) sequences in gene alignment as queries (or  
141 the longest sequence if the former covered <50% of the protein). To identify shared

142 taxa, taxon names were also standardized. A total of 16 “gene overlap” datasets were  
143 constructed as follows: for each set of pairwise shared genes, two gene overlap datasets  
144 were assembled by subsampling the two source datasets (i.e., same gene name, different  
145 source alignment); for the set of genes shared across all four datasets, four such datasets  
146 were built. The analogous procedure was used to create 16 “taxon overlap” datasets.  
147 Therefore, “gene overlap” datasets contained equivalent genes but retained the original  
148 taxon sampling, whereas “taxon overlap” datasets had comparable taxon sampling but  
149 retained the original gene sampling. Because BAU and BUR datasets contained some  
150 chimeric taxa from closely-related species (10 and 14, respectively), taxon sets were  
151 considered to overlap whenever at least one of the species in the chimeric taxa matched.

152 The 32 datasets were analyzed by ML using IQ-TREE v.1.5.1 under best-fit site-  
153 homogeneous models and 1,000 UFBoot pseudo-replicates. The eight datasets  
154 representing subsets of genes and taxa shared by all four datasets were further analyzed  
155 under the site-heterogeneous LG+C60+F+ $\Gamma$ 4 model. The topological distance among all  
156 resulting ML trees were measured with normalized Robinson-Foulds distances ( $nRF =$   
157  $RF/RF_{max}$ ; Kupezok et al. 2008), which accounts for differences in taxon sampling,  
158 using ETE 3 (Huerta-Cepas et al. 2016). Pairwise  $nRF$  distances were visualized using  
159 Kruskal’s non-metric multidimensional scaling in the R package MASS (Venables and  
160 Ripley 2002).

161

### 162 *Quantifying Gene Support for Archaeplastida Monophyly*

163

164 We assessed the support for PPE monophyly in the four original datasets following  
165 Shen et al. (2017). Briefly, we calculated the gene-wise log-likelihood score differences  
166 ( $\Delta GLS$ ) between tree topologies that differ in the monophyly of PPE or lack thereof.

167 For BAU, BRO, and BUR, the unconstrained ML trees inferred above had non-  
168 monophyletic PPE and the alternative trees were built by constrained ML searches  
169 (IQTREE; LG+C40/60+F+Γ4). For KAT, the unconstrained ML tree represented PPE  
170 monophyly and the alternative was built by breaking PPE monophyly according to  
171 BRO's unconstrained tree (it recovered a higher likelihood than using BAU or BUR).  
172 Site-wise log-likelihoods were calculated in IQ-TREE under the above models;  
173 likelihood differences between the competing topologies were calculated per site and  
174 averaged per gene ( $\Delta$ GLS) to quantify the gene support for or against Archaeplastida  
175 monophyly. For each dataset, we surveyed 5% of the most deviant genes (largest  $\Delta$ GLS,  
176 for or against Archaeplastida) and manually inspected alignments and ML gene trees in  
177 search of obvious contaminations or paralogy problems. To confirm paralogy issues,  
178 nuclear, mitochondrial, and/or plastid homologs from reference eukaryotes (human,  
179 mouse, rice, *Arabidopsis*, yeast) were retrieved from UNIPROT and added into gene  
180 alignments. To assess the effect of identified paralogs in the overall tree topologies, we  
181 removed problematic sequences and re-inferred ML trees from entire datasets as  
182 specified above.

183

#### 184 *New Combined Dataset*

185

186 To test whether data combination can improve the resolution of deep eukaryotic  
187 relationships, we merged the four original datasets accounting for shared genes and taxa  
188 and reducing missing data using available genomes, transcriptomes, or ESTs from  
189 public databases: NCBI, ENSEMBL, EukProt (Richter et al. 2020), MMETSP (Keeling  
190 et al. 2014), 1KP (Leebens-Mack et al. 2019), and OrthoMCL-DB v.5 (Chen et al.  
191 2006). For most species, protein sets were publicly available. For five species,



192 transcriptomes were assembled *de novo* using Trinity v.2.5.1 with default settings. For  
193 transcriptomes and ESTs, ORFs were predicted using TransDecoder v.3.0.1 (with the  
194 corresponding genetic code). The combined dataset was built in two steps. First, new  
195 taxa were added to the dataset containing the most genes (BUR, 250 genes). In practice,  
196 we started from a taxon-enriched version of the same dataset (Strassert et al. in prep) to  
197 which homologs for missing taxa were added using BLASTP (e-value  $<10^{-6}$ ) and  
198 retaining the two best hits to increase the chance of identifying the correct ortholog. The  
199 sets of homologous sequences were masked with PREQUAL v.1.01 (Whelan et al.  
200 2018) (default settings, excluding fast-evolving taxa — prokaryotes, Ascomycota,  
201 Hexamitidae, Microsporidia, and *Guillardia* nucleomorph — to avoid masking  
202 legitimate residues); aligned with MAFFT G-INS-i v.7.310 (Katoh and Standley 2013)  
203 with a variable scoring matrix to control for over-alignment (VSM; ‘--allowshift --  
204 unalignlevel 0.6’; [Katoh and Standley 2016]); alignment columns with  $>99\%$  missing  
205 data were trimmed with BMGE v.1.12 (Criscuolo and Gribaldo 2010); and gene trees  
206 were inferred with FastTree v.2.1.3 (Price et al. 2010) with default settings. Gene trees  
207 were visualized to ensure orthology, aided by the presence of appropriately labelled  
208 prokaryotic homologs and known paralogs from reference species. Obvious paralogs or  
209 contaminants were flagged, along with shorter homologs (up to two homologs per taxon  
210 were retained in BLASTP). All flagged sequences, as well as species not present in any  
211 of the four original datasets, were removed from the original (pre-PREQUAL)  
212 orthologous sets. The genes *FTSJ1* and *tubb* were excluded due to unresolved deep  
213 paralogy likely indicating a complex evolutionary history or too low phylogenetic  
214 signal.

215 In a second step, we targeted additional genes not present in BUR. Homologous  
216 gene alignments from BAU, BRO, and KAT were merged and complemented with

217 sequences from missing taxa using BLASTP as above. To aid in the identification of  
218 contaminants and paralogs, several prokaryotic and eukaryotic homologs from reference  
219 genomes were added. Gene sets were masked and aligned as specified above, and  
220 filtered with Divvier (option ‘-partial’), which implements an HMM-based parametric  
221 model that allows removing residues from alignment columns that lack strong  
222 homology evidence (Ali et al. 2019). Gene trees were inferred using RAxML v.8.2.4  
223 (Stamatakis 2014) under LG+ $\Gamma$ 4 and 100 rapid bootstrap replicates; visualized for the  
224 identification of obvious paralogs and contaminants, which were removed along with  
225 duplicated taxa from the original (pre-PREQUAL) orthologus sets. A second round of  
226 masking, aligning, divvying, gene tree inference, and visualization was done in order to  
227 flag possible remaining contaminants or paralogs. During the two rounds of dataset  
228 cleanup a total of 28 genes were excluded due to unresolved deep paralogy, likely  
229 indicating complex evolutionary histories or low signal (including *EF2*, see below). The  
230 final gene sets were masked and aligned as specified above and concatenated with  
231 SCaFoS v.1.25 (Roure et al. 2007). The new combined dataset had 311 (248 + 63)  
232 genes and 344 taxa. Gene alignments of the combined dataset were subjected to three  
233 alignment trimming methods: (i) untrimmed (in practice, >99% incomplete columns  
234 removed), (ii) filtering non-homologous residues with Divvier (‘-partial’), and (iii)  
235 entropy-based block trimming with BMGE (‘-b 5 -m BLOSUM75 -g 0.2’). The sets of  
236 311 gene alignments were concatenated into three datasets containing respectively (i)  
237 202,042 (COMB-UNTRIM), (ii) 160,090 (COMB-DIVPART), and (i) 75,055 (COMB-  
238 BMGE) aligned amino acids, respectively. The combined (untrimmed) dataset was  
239 inspected for outlier loci by calculating gene-wise log-likelihoods and visualizing gene  
240 trees of the 5% most deviant genes, as done above.

241 ML trees were inferred from the three combined datasets using IQ-TREE v.1.6.5  
242 with best-fit LG+I(+F)+ $\Gamma$ 4 site-homogeneous models and 1,000 UFBoot pseudo-  
243 replicates. For computational tractability, we reduced the three datasets to 98 taxa  
244 (maintaining phylogenetic diversity) and analyzed them under more complex  
245 LG+C60+ $\Gamma$ 4 mixture models. In addition, the shortest taxon-reduced dataset (COMB-  
246 BMGE-98) was analyzed under the better-fitting CAT-GTR model in PhyloBayes MPI  
247 v.1.8 (Lartillot et al. 2013) (larger datasets were intractable). The relative fit of LC60 vs.  
248 CAT-GTR was assessed by 10-fold cross-validation using PhyloBayes MPI and a  
249 random gene sample of 20,000 amino acid positions. The topological distance among  
250 the resulting ML and Bayesian trees, along with those of the original datasets, were  
251 calculated as nRF and plotted after non-metric multidimensional scaling.

252

### 253 *Effect of Alignment Filtering Algorithms*

254

255 We approximated the phylogenetic signal in the three differently trimmed combined  
256 datasets by calculating the topological congruence between gene trees and the  
257 corresponding concatenated ML trees. Gene trees were inferred by ML in IQ-TREE  
258 v.1.6.10 with best-fit models and SH-aLRT with 1,000 replicates. For each treatment  
259 (untrimmed, Divvier partial, BMGE), we quantified the topological distances between  
260 gene trees and concatenated trees with nRF and the proportion of highly (SH-aLRT >  
261 0.85) and lowly supported bipartitions that were congruent or not with the concatenated  
262 trees. Calculations were implemented in python3 with the aid of ETE3.

263

264

265

266 **Results**

267

268 *Controlling for Evolutionary Model and Gene and Taxon Sampling Does Not Resolve*

269 *Incongruence*

270 A direct comparison of the phylogenetic relationships reported in the four original

271 studies is complicated by the fact that they were analyzed with different methods and

272 models, and only partially overlapped in genes and taxa. These differences make it

273 difficult to identify the contribution of phylogenetic methodologies and of specific loci

274 and taxa combinations in resolving the placement of PPE in the tree. To obtain baseline

275 information across the four datasets, we re-analyzed the original alignments under

276 consistent methods and models (IQ-TREE ML under best-fit site-homogeneous and

277 mixture models). These analyses confirmed the recovery of monophyletic

278 Archaeplastida in KAT (UFBoot = 91-95%) and lack thereof in the remaining three

279 datasets, which did not converge to a congruent alternative topology (Fig. 1). The use of

280 empirical profile mixture models (+C40/C60) did not change the inferred relationships

281 among PPE.

282 Subsets of shared genes and taxa were equally inconclusive regarding the

283 relationships among PPE. The monophylies of the three main lineages —Glaucophyta,

284 Rhodophyta, Chloroplastida— were recovered with strong support by most subsets, as

285 were other non-controversial clades such as SAR. However, Archaeplastida monophyly

286 was not recovered by any of the 32 subsets of shared genes or taxa (except one with

287 UFboot = 51%; Supplementary Table 1). Tree topologies obtained from the “gene

288 overlap” datasets (with comparable genes but different taxa) clustered by source dataset

289 that shared taxon sampling (Fig. 2a), suggesting that taxon sampling is a key factor in

290 determining the overall tree topology. However, no taxa combinations that favored the

291 monophyly of Archaeplastida was identified. In the case of topologies obtained from the  
292 “taxon overlap” datasets (with comparable taxa but different genes), the clustering by  
293 source dataset that shared gene sampling was less clear: some subsets converged to  
294 relatively similar topologies (e.g., BUR-BAU and BAU-BUR) whereas others did not  
295 (Fig. 2b). Trees containing only the 20 taxa shared by all four datasets had relatively  
296 similar topologies but differed in key relationships (i.e., deep relationships within  
297 Diaphoretickes). In both “gene overlap” and “taxon overlap” datasets, the trees obtained  
298 from the KAT dataset were the most scattered in the tree space (Fig. 2).  
299

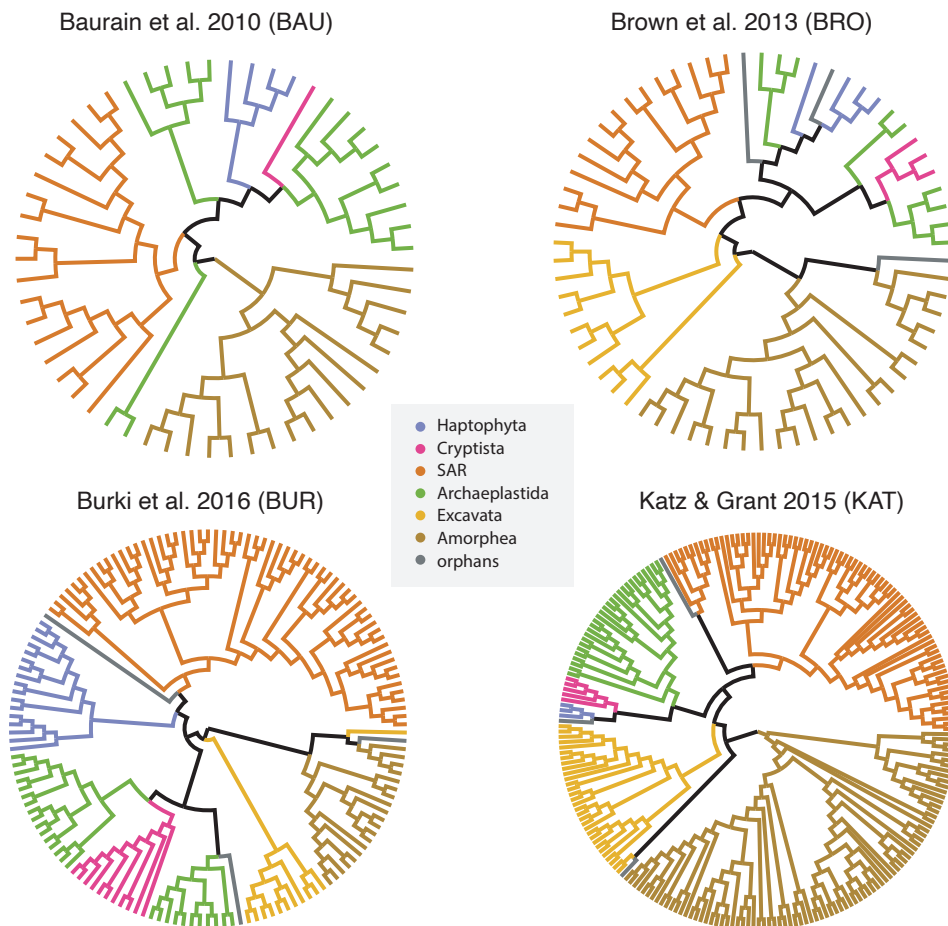

300 **Figure 1.** Maximum likelihood phylogenies inferred from the four original datasets  
301 (BAU, BRO, BUR, KAT) under empirical mixture models (IQ-TREE). Major  
302 eukaryotic lineages are shown (orphans: *Telonemia*, *Collodiction*, *Picozoa*).

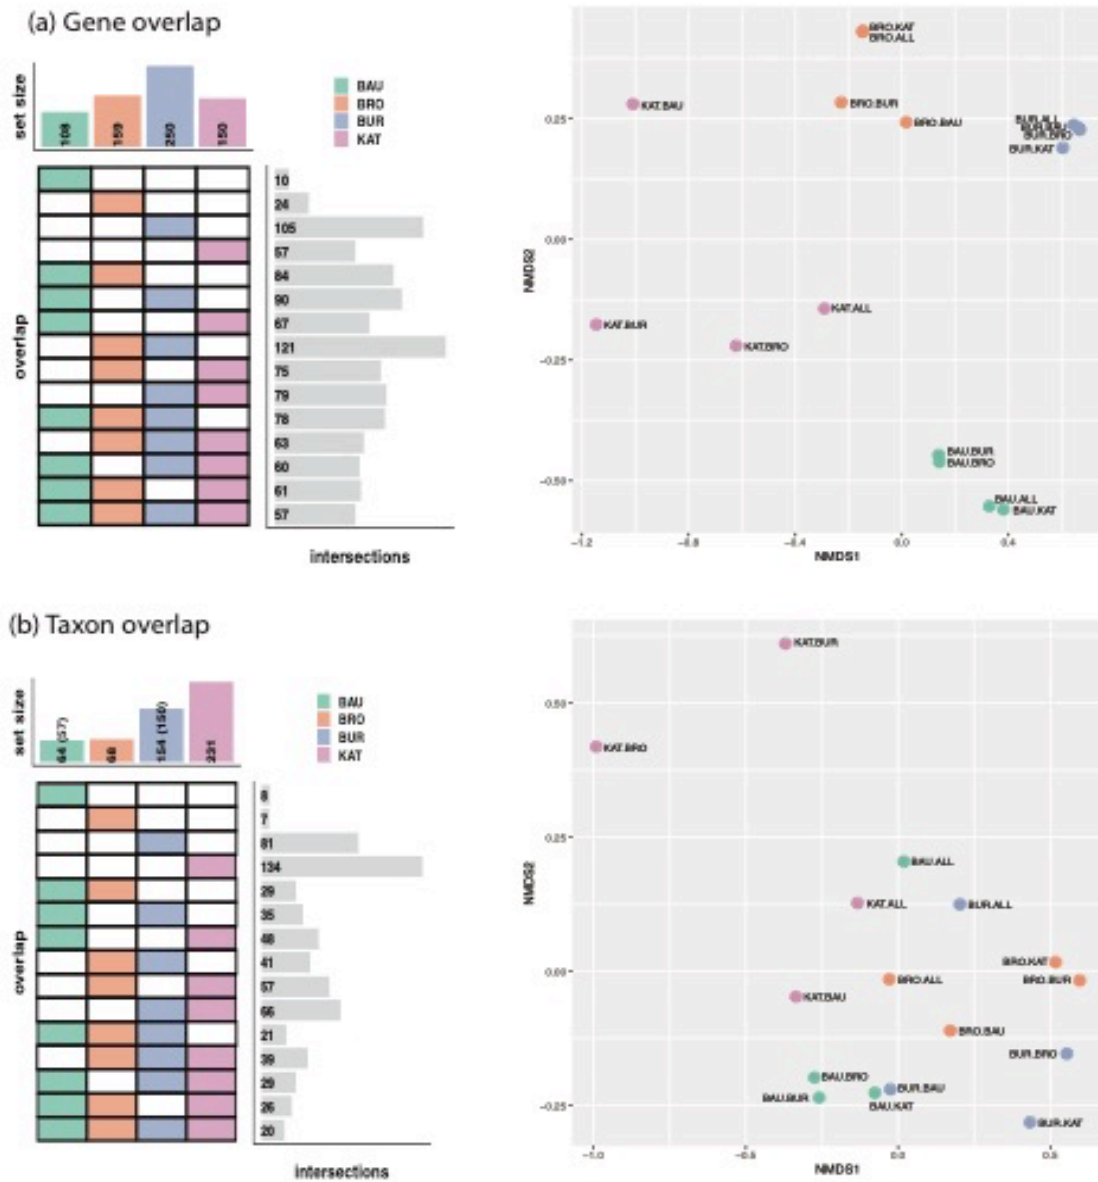

304 **Figure 2.** Taxon and gene overlap among the four analyzed datasets. Left graphs  
 305 display the intersections of shared (a) genes and (b) taxa, whereas the right graphs show  
 306 the topological distances among maximum likelihood trees from the corresponding  
 307 overlapping datasets. Topological distances are measured as normalized Robinson-  
 308 Foulds (nRF) distances between all pairs of trees and plotted after Kruskal’s non-metric  
 309 multidimensional scaling (axes represent the inferred coordinates). Datasets are colored  
 310 according to the source dataset.

311 *Undetected Paralogy Biases Deep Eukaryotic Relationships*

312

313 Gene-wise likelihood scores ( $\Delta$ GLS) showed widespread conflict in all four datasets  
314 regarding the relationships of PPE: about two thirds of the genes in BRO (93 vs. 66)  
315 and BUR (143 vs. 107) favored non-monophyletic PPE ( $\chi^2$ -test's  $p < 0.05$ ) whereas  
316 more genes supported the monophyly in BAU (48 vs. 60) and KAT (75 vs. 76)  
317 (Supplementary Table 2). For most genes,  $\Delta$ GLS were small ( $< 10$  for an average gene  
318 likelihood score of  $-\ln L=13,481$ ) but several outliers stood out in all datasets (Fig. 3).  
319 We investigated the 5% most deviant outliers in each dataset to identify causes for the  
320 conflicting signal regarding Archaeplastida monophyly. The majority of outliers from  
321 BAU, BRO, and BUR recovered PPE lineages clearly apart but with low support (e.g.,  
322 *COPG2*, *DRG2*, *POLR3B* or *SARS* in BUR). Two loci (*RPL19* from BRO and *PSMCI*  
323 from BUR) recovered monophyletic Archaeplastida with low support. None of the  
324 inspected outliers in these three datasets showed obvious problems of paralogy or  
325 contamination, with two exceptions.

326 In BUR, the *UBA3* gene contained two divergent sequences that were likely  
327 contaminants or paralogs (*Plasmodium falciparum* and *Cyanidioschyzon merolae*;  
328 Supplementary Fig. 2). The removal of these two sequences did not significantly change  
329 the gene tree but switched the  $\Delta$ GLS in favor of Archaeplastida monophyly. In BAU,  
330 the *EF2* gene displayed a strong signal against Archaeplastida monophyly (Fig. 3;  
331 Supplementary Fig. 3). Although we did not observe obvious contamination or paralogy  
332 problems, Glaucophyta was placed within Amorphea with strong support and away  
333 from a Rhodophyta + Chloroplastida clade, as reported before (Kim and Graham 2008).  
334 *EF2* alignment positions supporting the non-monophyly of PPE were not clustered,  
335 which could be expected from fused chimeric sequences (Supplementary Fig. 4). The



336 removal of *EF2* from BAU did not alter the non-monophyly of Archaeplastida, but  
337 impacted other deep eukaryotic relationships. In particular, Glaucophyta was placed as  
338 sister to Chloroplastida + Haptophyta (Supplementary Fig. 5) and not as sister to all  
339 Diaphoretickes as in the original dataset (Fig. 1), consistent with the close affinity of  
340 Glaucophyta and Amorphea recovered by *EF2*. The *EF2* gene was also present in BRO  
341 and KAT, and while the gene trees consistently showed non-monophyletic PPE,  $\Delta$ GLS  
342 were smaller (respectively, 3.06 and 0.68 vs. 50.10 in BAU). These differences could  
343 reflect a benefit of increased taxon sampling, but other factors such as rate differences  
344 decreasing the support for alternative topologies cannot be excluded (Walker et al.  
345 2020).

346 In KAT, six out of the eight most extreme outliers strongly supported  
347 Archaeplastida monophyly (Fig. 3). A closer look revealed that all six genes had clear  
348 paralogy issues, often with a mix of nuclear, mitochondrial, and plastidial paralogs.  
349 Paralogs were confirmed by ML gene trees after the addition of nuclear, mitochondrial,  
350 and plastidial homologs from reference genomes (Supplementary Figs. 6-11). The  
351 removal of these paralogs from outlier loci in KAT was enough to break the monophyly  
352 of Archaeplastida recovered initially (IQ-TREE LG+C60+F+ $\Gamma$ 4; Supplementary File  
353 12).

354

### 355 *Larger Combined Datasets Have Higher Resolving Power*

356

357 To overcome the limited phylogenetic signal in the four individual datasets, we  
358 assembled a larger combined dataset by accounting for shared genes and taxa,  
359 culminating in 311 genes and 344 taxa. This combined dataset was subjected to careful  
360 data curation to avoid the adverse effect of paralogy and contamination. We evaluated



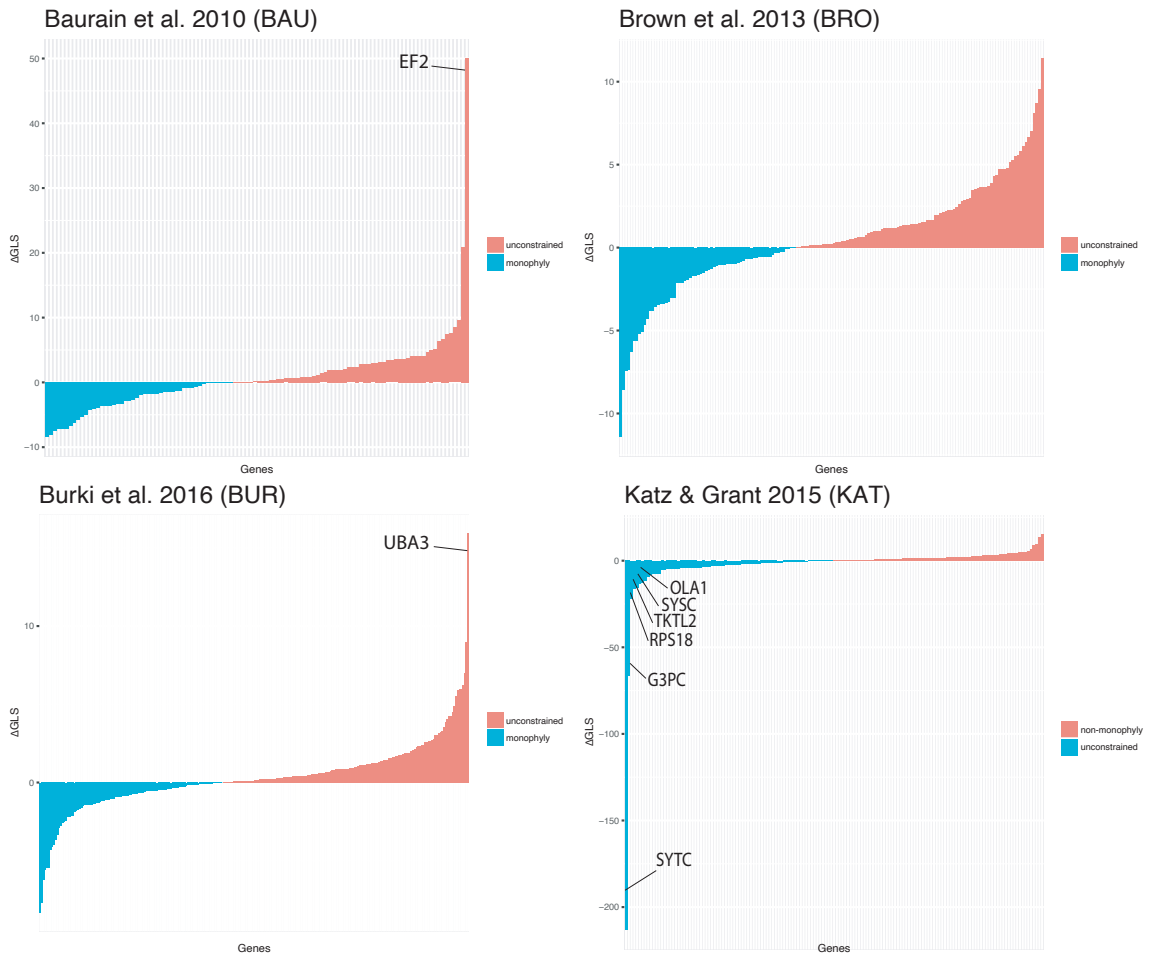

361

362 **Figure 3.** Outlier detection. Gene-wise log-likelihood score differences ( $\Delta$ GLS) in  
363 support (blue) or against (red) the monophyly of Archaeplastida. Calculations follow  
364 Shen et al. (2017). Outliers discussed in the text are highlighted.

365

366 the gene support for Archaeplastida through  $\Delta$ GLS, which again showed widespread  
367 conflict for Archaeplastida monophyly: 129 genes supported Archaeplastida monophyly  
368 whereas 182 genes did not (Supplementary Fig. 13). However, a close look at the 5%  
369 most extreme outliers revealed no obvious paralogy or contamination issues. To analyze  
370 this dataset, we derived three concatenated alignments after applying different site  
371 trimming strategies (COMB-UNTRIM, COMB-DIVPART, COMB-BMGE), and for

372 each alignments we subsampled to 98 representative taxa for computational tractability  
373 of mixture models (see below).

374 The completeness of all datasets were assessed with recently proposed alignment  
375 descriptive metrics (Wong et al. 2020) (Supplementary Table 3 and Supplementary  
376 Figs. 14 and 15). The individual datasets varied in their overall completeness ( $C_a$ ) from  
377 0.59 in KAT to 0.84 in BAU. The per-column completeness ( $C_c$ ) was generally high, as  
378 expected from trimmed alignments. The per-row completeness ( $C_r$ ) (i.e., taxa) was high  
379 for BAU and BUR but variable for BRO and especially for KAT. This was reflected in  
380 the higher proportion of shared amino acids between pairs of sequences (i.e., completely  
381 specified shared homologous sites or  $C_{ij}$ ) in BAU and BUR compared to BRO and  
382 KAT. In comparison, the combined datasets, especially those with the full taxon  
383 sampling, had generally lower overall completeness ( $C_a = 0.34\text{--}0.64$ ) and the more  
384 aggressively trimmed datasets (BMGE) had higher matrix occupancy.

385 We also assessed the phylogenetic informativeness of all datasets by measuring  
386 the internal consistency among gene trees. Internal consistency was measured by  
387 normalized Robinson-Foulds distances (nRF) between gene trees and concatenated  
388 trees. Loci with limited signal are expected to produce gene trees that differ the most  
389 from the concatenated tree (stochastic error). Similarly, the presence of contaminants,  
390 paralogs, or very heterogeneous evolutionary patterns will also result in larger nRF. The  
391 combined datasets showed higher consistency (lower nRF) than any of the four original  
392 datasets, and were larger in terms of total alignment length and number of taxa. This  
393 pattern was maintained after correcting nRF for gene length, as shorter genes could be  
394 more prone to stochastic error (Supplementary Fig. 16). BAU, BRO, and KAT showed  
395 higher nRF than BUR, which was closer to COMB-BMGE, but the difference with  
396 KAT and BRO became smaller after correcting for gene length. Among the combined

397 datasets, untrimmed alignments (COMB-UNTRIM) showed the highest consistency  
398 (lowest nRF), followed by COMB-DIVPART and COMB-BMGE. Internode certainty  
399 measures on the COMB-UNTRIM dataset identified substantial gene tree conflicts,  
400 particularly for deep branches (Supplementary Fig. 17). These conflicts did not derive  
401 primarily from short branches (Supplementary Fig. 18) as might be expected under high  
402 prevalence of incomplete lineage sorting.

403

#### 404 *Aggressive Alignment Filtering Reduces Phylogenetic Signal*

405

406 The effect of alignment trimming algorithms on recovering deep eukaryotic  
407 relationships was compared in detail by looking at the congruence between gene and  
408 concatenated trees, as well as the proportion of congruent and incongruent bipartitions  
409 in the combined datasets. While the distribution of nRF distances overlapped to a high  
410 degree, the mean nRF of COMB-UNTRIM was smallest (i.e., highest congruence),  
411 followed by COMB-DIVPART and COMB-BMGE (Supplementary Fig. 19a). COMB-  
412 UNTRIM also recovered the highest proportion of highly-supported congruent  
413 bipartitions whereas COMB-BMGE recovered more incongruent branches, but  
414 generally with low support (Supplementary Fig. 19b). COMB-DIVPART was  
415 indistinguishable from COMB-UNTRIM for short gene alignments (<400 amino acids)  
416 (Supplementary Fig. 19c). Despite the overall better performance of COMB-UNTRIM,  
417 COMB-BMGE and COMB-DIVPART performed best for a few genes, which were  
418 shorter than the average (Supplementary Fig. 19d-e).

419

#### 420 *Monophyly of Archaeplastida and the Tree of Eukaryotes*

421

422 The three combined datasets (COMB-UNTRIM, COMB-DIVPART, COMB-BMGE)  
423 were analyzed by ML under best-fitting site-homogeneous (LG(+F)+I+ $\Gamma$ 4) and mixture  
424 models (LG+C60+ $\Gamma$ 4), the latter with a reduced 98-taxon sampling for computational  
425 tractability. Under the site-homogeneous models, COMB-BMGE (Supplementary Fig.  
426 20) recovered monophyletic Amorphea, including Opisthokonta, Amoebozoa,  
427 Apusomonadida, and Breviatea. As rooted with Amorphea, *Malawimonas* +  
428 *Collodictyon* and Excavata were branching successively as sister to all other eukaryotes.  
429 Haptophyta was the sister group of a Telonemia + SAR clade (TSAR; Strassert et al.  
430 2019). Archaeplastida was not recovered as monophyletic, with Cryptista being sister to  
431 Glaucophyta + Chloroplastida (with low support) to the exclusion of a Rhodophyta +  
432 Picozoa clade. COMB-DIVPART and COMB-UNTRIM (Supplementary Figs. 21 and  
433 22) differed from COMB-BMGE in that fast-evolving Entamoeba (Amoebozoa) were  
434 recovered within long-branched metamonads (Excavata), likely due to long-branch  
435 attraction. COMB-UNTRIM further differed in the position of Telonemia, which was  
436 not recovered as sister to SAR but to Picozoa. This might be an artifact due to the  
437 relatively high proportion of missing data in both taxa (97,107 and 15,833 out of  
438 202,042 aligned amino acid positions, respectively for Telonemia and Picozoa).

439 When analyzed under the better-fitting LG+C60+ $\Gamma$ 4 mixture model, all 98-taxon  
440 combined datasets (COMB-UNTRIM-98, COMB-DIVPART-98, COMB-BMGE-98)  
441 converged to a very similar topology (Fig. 4). Compared with the 344-taxon datasets,  
442 Excavata were recovered in three successive lineages: (i) *Malawimonas*, (ii)  
443 Metamonada, and (iii) Discoba. Amoebozoa was recovered as monophyletic, indicating  
444 that the long-branch attraction artefact observed with site-homogeneous models was  
445 mitigated. Haptophyta was sister to SAR. Importantly, all 98-taxon datasets recovered the  
446 monophyly of Archaeplastida, with Cryptophyta as its sister group (Fig. 5 and

447 Supplementary Figs. 23-25). The support for Archaeplastida increased with the total  
448 length of the alignments (COMB-BMGE-98: 46/88 UFBOOT/aLRT; COMB-  
449 DIVPART-98: 83/92; COMB-UNTRIM: 87/98). This was also the case for other  
450 relationships between major groups such as Haptophyta + SAR (Fig. 5 and  
451 Supplementary Figs. 23-25). Within Archaeplastida, Rhodophyta was sister to  
452 Glaucophyta + Chloroplastida with high support, which is consistent with the groupings  
453 observed in the analyses of the 344-taxa datasets (UFBoot > 98; SH-aLRT  $\geq$  96). The  
454 Bayesian analysis of COMB-BMGE-98 with the CAT-GTR model recovered identical  
455 deep eukaryotic relationships with strong support (BPP = 1.0), including monophyletic  
456 Archaeplastida sister to Cryptista, and Rhodophyta sister to Glaucophyta +  
457 Chloroplastida (Fig. 4 and Supplementary Fig. 26). CAT-GTR provided a better fit than  
458 LG+C60 (10-fold cross-validation score  $1197.12 \pm 81.5634$ ), but as frequently seen in  
459 deep eukaryotic phylogenomic analyses (Burki et al. 2016; Brown et al. 2018;  
460 Gawryluk et al. 2019), the three MCMC chains failed to converge after >7,000 cycles  
461 (maxdiff = 1, meandiff = 0.0158). Notably, the lack of convergence was due to  
462 unresolved positions of long-branched amoebozoans and excavates, reflecting the  
463 difficulty of correctly placing these lineages, but all three MCMC chains agreed in the  
464 remaining bipartitions including Archaeplastida monophyly.

465

466

467

468

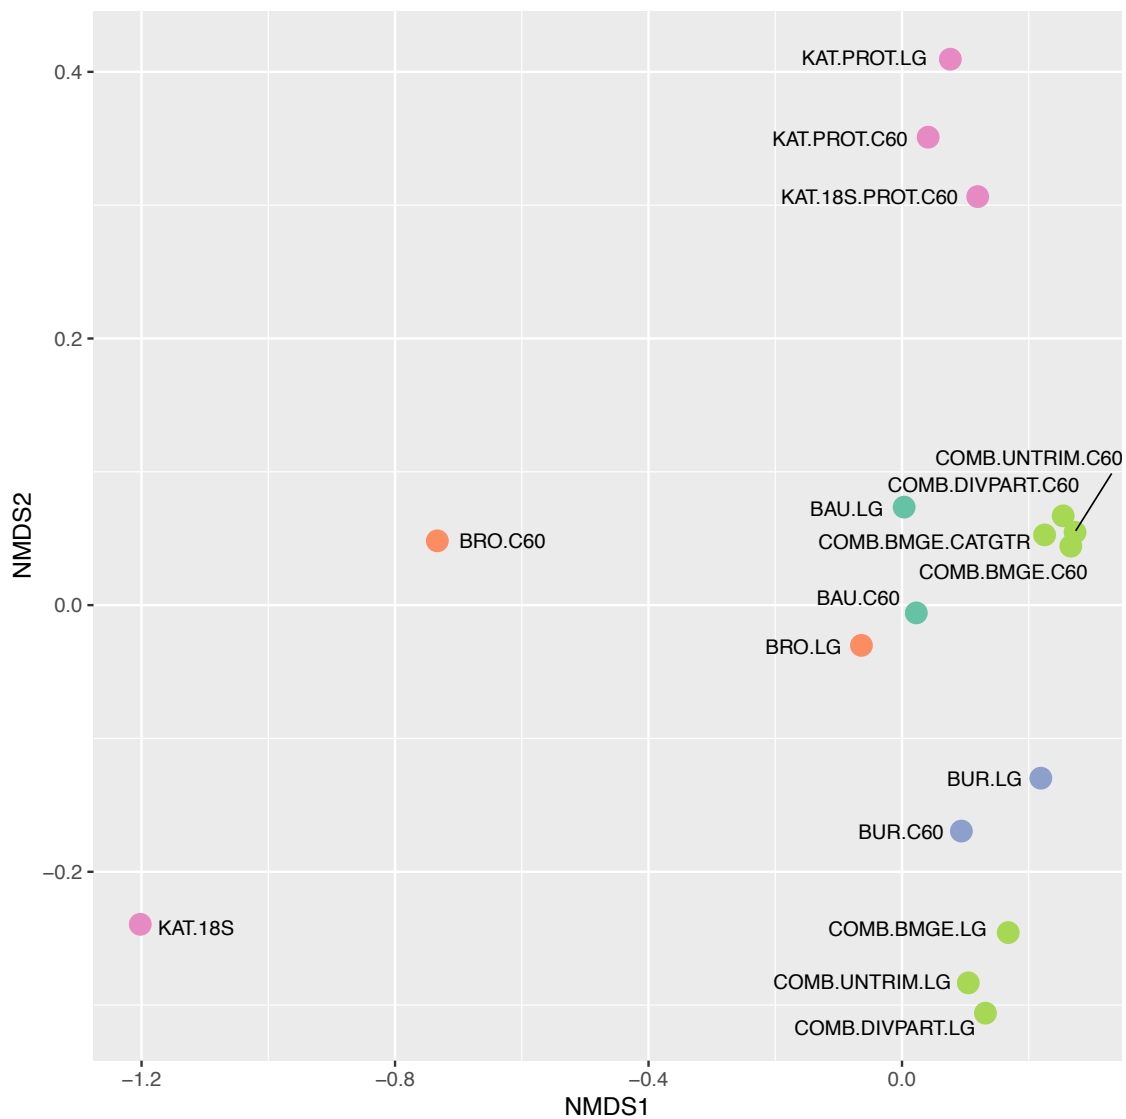

469

470 **Figure 4.** Topological distance among concatenated maximum likelihood trees from the  
471 original (BAU, BRO, BUR, KAT) and combined (COMB) datasets. Phylogenetic trees  
472 have been analyzed with both best-fit site-homogeneous (LG) and mixture (C60)  
473 models. KAT was analyzed in full and as separate 18S rRNA and protein partitions.  
474 Topological distances are measured as pairwise normalized Robinson-Foulds distances  
475 among shared taxa (nRF) and then plotted after Kruskal's non-metric multidimensional  
476 scaling (axes represent the inferred coordinates).

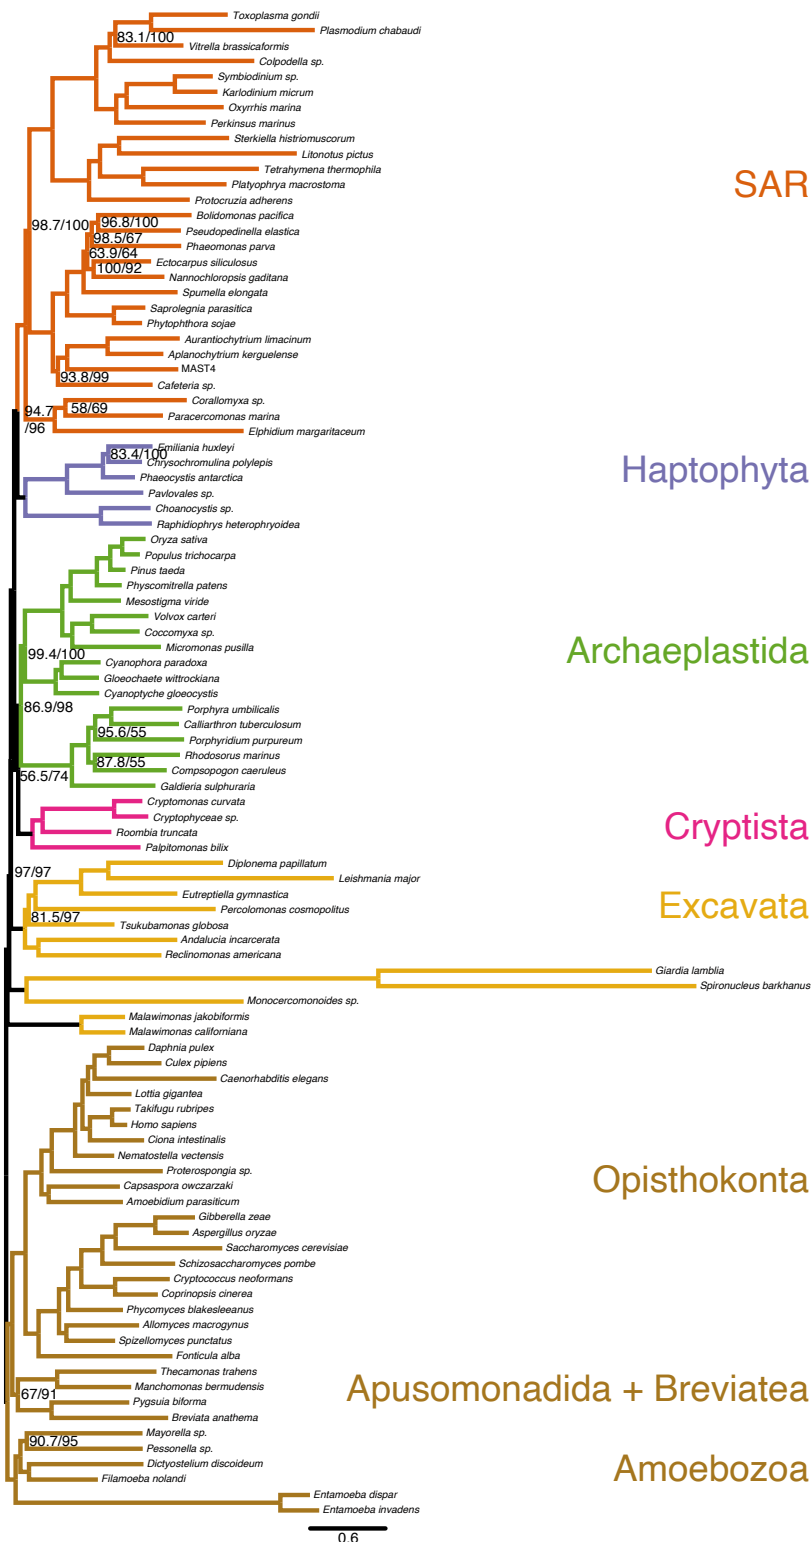

477

478 **Figure 5.** Maximum likelihood analysis of the combined (COMB-UNTRIM-98) dataset

479 analyzed under LG+C60+I+Γ4 (IQ-TREE). Branch support is UFBoot/SH-aLRT; nodes

480 without values received full support (100/100). Branch lengths are in expected

481 substitutions per site.

## 482 **Discussion**

483

### 484 *Resolving Recalcitrant Relationships in the Deep Phylogeny of Eukaryotes*

485

486 Resolving the backbone of the eukaryotic Tree of Life is a complex endeavor requiring  
487 the inference of events dating back >1 Ga. Thanks to decades of phylogenetic research  
488 and more recently the advent of phylogenomics, the shape of the tree has been  
489 progressively refined, while some relationships have remained contentious (Burki et al.  
490 2020). One such contentious grouping is Archaeplastida and its position within  
491 Diaphoretickes. Here, we have investigated the ancient origin of Archaeplastida and  
492 showed that recovering enough phylogenetic signal to resolve the monophyly of this  
493 group requires the assembly of larger datasets (in particular more genes), careful data  
494 curation for the removal of paralogs and contaminants, and the use of mixture models  
495 that better account for heterogeneous evolutionary patterns.

496       None of the four original datasets under study contained enough signal to resolve  
497 the phylogenetic affinities of PPE with confidence, nor to identify strongly supported  
498 alternatives. The identification of subsets of shared taxa and genes across the four  
499 datasets did not lead to specific combinations of taxa or genes that helped recovering the  
500 monophyly of Archaeplastida. Heavily reducing taxon sampling to the 20 taxa shared  
501 by all four datasets produced more similar trees, but these were still inconclusive  
502 regarding PPE relationships. Heavily reducing gene sampling to the 57 genes common  
503 to all four datasets did not result in more similar trees, suggesting increased stochastic  
504 error with fewer loci. The poor signal for PPE relationships remained true after the  
505 identification of several paralogs that compromised phylogenetic accuracy (Fig. 3). In  
506 particular, the KAT dataset contained plastid paralogs (Supplementary Figs. 6-11) that



507 artificially inflated the support for Archaeplastida due to the strong signal for  
508 monophyly in plastid genes (Baurain et al. 2010; Criscuolo and Gribaldo 2011; Ponce-  
509 Toledo et al. 2017; Sánchez-Baracaldo et al. 2017). The removal of the identified  
510 paralogs from this dataset led to the loss of the Archaeplastida monophyly recovered by  
511 the original dataset (Supplementary Fig. 12). In BAU, we found that the removal of one  
512 outlier locus (*EF2*) changed deep eukaryotic relationships. Although we could not  
513 identify obvious problems of paralogy or contamination, we observed a strong affinity  
514 between Glaucophyta and Amorphea, in agreement with previous studies suggesting  
515 hidden paralogy or horizontal gene transfer (Reeb et al. 2009; Atkinson and Baldauf  
516 2010). These results confirm previous reports of phylogenomic datasets being driven by  
517 a handful of loci (Brown and Thomson 2017; Shen et al. 2017; Siu-Ting et al. 2019).  
518 Therefore, carefully dissecting the signal in phylogenomic datasets is crucial to identify  
519 problematic loci and biases and the distribution of phylogenetic signal. The  
520 development of new approaches to outlier identification (Walker et al. 2020) and  
521 automated pipelines for gene alignment curation (e.g., PhyloToL [Cerón-Romero et al.  
522 2019]; PhyloFisher: <https://pypi.org/project/phylofisher/>) represent important advances  
523 for the assembly of large and accurate eukaryotic phylogenomic datasets.

524         Given the limited signal of the original datasets, we tested whether the  
525 combination of data improved the placement of PPE lineages. The combined datasets  
526 showed higher internal consistency than for any of the four source datasets  
527 (Supplementary Fig. 16), which we interpret as evidence for stronger genuine  
528 phylogenetic signal. Importantly, the strength of this signal was not associated with  
529 higher alignment completeness metrics (*sensu* Wong et al. 2020). The combined  
530 datasets also showed substantial conflict among genes with regards to the support of  
531 Archaeplastida (Supplementary Fig. 13) and deep eukaryotic relationships as a whole

532 (Supplementary Fig. 17), although we did not identify obvious issues of paralogy or  
533 contamination in the outlier loci. Phylogenetic conflict measured as internode certainty  
534 was not preferentially associated with short branches, as expected under predominance  
535 of incomplete lineage sorting (Marcussen et al. 2014; Supplementary Fig. 18),  
536 suggesting that other sources of conflict, such as stochastic error or heterogeneous  
537 evolutionary patterns, are likely more prevalent (Bryant and Hahn 2020).

538 The phylogenetic analysis of the combined datasets under better-fitting mixture  
539 models converged to an overall consistent topology, in particular for the monophyly of  
540 Archaeplastida (Fig. 4). Mixture models can better account for heterogeneous  
541 evolutionary patterns in the data thereby reducing the risks of systematic errors  
542 (Rodríguez-Ezpeleta et al. 2007b; Philippe and Roure 2011; Wang et al. 2018). Simpler  
543 site-homogeneous models (LG) never recovered Archaeplastida, except in the presence  
544 of plastid paralogs in the KAT dataset. Model cross-validation showed that infinite  
545 profile mixtures (CAT), which infer amino acid profiles from the data, fit our combined  
546 datasets better than empirical mixtures with pre-defined number of profiles and weights  
547 (C60). Yet, both CAT-GTR (BI) and LG-C60 (ML) analyses reconstructed congruent  
548 tree topologies both consistently supporting the monophyly of Archaeplastida. The  
549 current implementation of CAT-GTR in PhyloBayes proved computationally  
550 challenging and failed to converge, as often seen in other studies of deep eukaryotic  
551 relationships (Kang et al. 2017; Burki et al. 2016; Gawryluk et al. 2019). In this  
552 respect, the development of more efficient implementations of existing models (Dang  
553 and Kishino 2019) and new mixture models (Schrepf et al. 2020) should contribute to  
554 further resolving the eukaryotic tree of life.

555

556 *Effect of Alignment Filtering Algorithms*

557

558 To understand the effect of alignment filtering in resolving the eukaryotic tree, we  
559 performed an empirical comparison between: (i) untrimmed data, (ii) the probabilistic  
560 algorithm Divvier (Ali et al. 2019), and (iii) BMGE, a commonly used block trimming  
561 method. In agreement with Tan et al. (2015), we found that untrimmed gene alignments  
562 retained more phylogenetic signal (lower nRF to the concatenated tree) than block-  
563 trimmed alignments (Supplementary Fig. 19a). Divvier, which was not assessed in Tan  
564 et al. (2015), was less accurate than no trimming but retained more signal than block  
565 trimming. Divvier's reduced accuracy affected mostly longer genes (>400 aligned  
566 amino acids; Supplementary Fig. 19c). We note that aggressive block trimming does not  
567 only decrease the accuracy of gene trees, but can also affect the tree topology and  
568 support values of hundreds of concatenated loci (Supplementary Figs. 20–24). This is  
569 particularly the case when the phylogenetic signal is weak or confounded by substantial  
570 conflict. In the case of Archaeplastida, more aggressive trimming decreased the  
571 statistical support for its monophyly.

572

### 573 *Implications for Eukaryotic Evolution*

574

575 Inferring the monophyly of Archaeplastida was only possible using the combined  
576 evidence from the four datasets, careful data curation, and the application of complex  
577 mixture models. Our analyses consistently recovered the monophyly of Archaeplastida  
578 with both ML and BI methods, in contrast to recent reports of conflicting ML and BI  
579 hypotheses (Brown et al. 2018; Gawryluk et al. 2019; Strasser et al. 2019). The  
580 monophyly of Archaeplastida has also been recovered in two recent studies (Lax et al.  
581 2018; Price et al. 2019) although these are a minority among the datasets with a broad

582 sampling of the eukaryotic diversity (Hampel et al. 2009; Baurain et al. 2010; Parfrey et  
583 al. 2010; Burki et al. 2012, 2016; Brown et al. 2013; Yabuki et al. 2014; Janoušková et  
584 al. 2017). In our analyses, Cryptista was the sister group to Archaeplastida, a result that  
585 contrasts with previous studies that found it branching within Archaeplastida (Burki et  
586 al. 2016) or as sister to Haptophyta (Brown et al. 2018).

587         Within Archaeplastida, Rhodophyta was the sister group to Glaucophyta +  
588 Chloroplastida, in agreement with some recent phylogenomic analyses (Brown et al.  
589 2018; Lax et al. 2018; Gawryluk et al. 2019; Price et al. 2019) and other studies that  
590 despite not recovering Archaeplastida, inferred a Glaucophyta + Chloroplastida clade  
591 (Burki et al. 2012, 2016; Brown et al. 2018). This contrasts with the earlier divergence  
592 of Glaucophyta favored by many plastid phylogenies (Ponce-Toledo et al. 2017;  
593 Sánchez-Baracaldo et al. 2017; Reyes-Prieto et al. 2018), even though the Rhodophyta-  
594 first hypothesis has also been recovered by plastid genes (Criscuolo and Gribaldo 2011;  
595 Lang and Nedelcu 2012). An earlier divergence of Chloroplastida has also been  
596 proposed based on plastid genes transferred to the nucleus during endosymbiosis  
597 (Deschamps and Moreira 2009).

598

### 599 *Origin and Evolution of Primary Plastids*

600

601 In addition to further resolving the tree of eukaryotes, the recovery of Archaeplastida  
602 with nuclear data fills an important gap in our understanding of plastid origins. It is  
603 commonly assumed that primary plastids originated once in an ancestor of  
604 Archaeplastida (Reyes-Prieto et al. 2007; Gould et al. 2008; Löffelhardt 2014). This  
605 hypothesis of a single endosymbiosis was initially based on a similar double envelop  
606 surrounding both primary plastids and cyanobacteria, and the homology of the transit

607 machinery for plastid protein import in all PPE. It also more easily explained some  
608 similarities of plastid genomes, such as the presence of a conserved set of genes and  
609 microsyntenic regions (Stoebe and Kowallik 1999), and the unusual tRNA-Leu group I  
610 intron (Besendahl et al. 2000). Endosymbiotically-derived gene clusters (Ku et al. 2015)  
611 and mosaic metabolic pathways (Reyes-Prieto and Bhattacharya 2007) have been  
612 interpreted as additional evidences for a common origin. Yet, all these evidence for a  
613 common origin are based on plastid data, but the similarities in plastid genomics and  
614 cell biology could at face value also be explained by alternative scenarios (e.g.,  
615 independent or serial endosymbioses) in which hosts are not necessarily monophyletic  
616 (Supplementary Fig. 1) (Mackiewicz and Gagat 2014). Although typically considered  
617 less parsimonious than a single endosymbiosis, the possibility of serial endosymbioses  
618 has recently gained popularity in the case of the evolution of secondarily-derived plastid  
619 of red algal origin (Bodył et al. 2009; Stiller 2014). Similarly, secondarily-derived  
620 plastids of green algal origin are known to have independent origins (Rogers et al. 2007;  
621 Takahashi et al. 2007).

622 Therefore, it is critical to demonstrate not only the common origin of plastids, but  
623 also that host lineages of Archaeplastida are monophyletic, in order to make a strong  
624 argument in favor of a single primary endosymbiosis (Mackiewicz and Gagat 2014). As  
625 mentioned above, the monophyly of Archaeplastida has thus far only been sporadically  
626 recovered based on nuclear (host) markers, and it was unclear whether Archaeplastida  
627 was in fact polyphyletic or if stochastic and/or systematic errors in phylogenomic  
628 datasets have prevented the consistent inference of this clade. We have clarified this  
629 question by providing a well resolved eukaryotic tree with Archaeplastida consistently  
630 monophyletic, as well as describing a set of conditions that previously prevented the  
631 recovery of this group.

632 **Conclusion**

633

634 In this study, we have investigated in detail the phylogenetic signal in four available  
635 datasets for one of the most pressing questions in eukaryote evolution: the monophyly  
636 of Archaeplastida. Neither the re-analysis of these datasets taken individually with  
637 better-fitting mixture models, nor various combinations of genes and taxa, provided  
638 enough signal to clarify the deep eukaryote relationships. It took the combination of the  
639 four datasets, together with a rigorous data curation pipeline and the application of  
640 complex mixture models, to recover enough information at this phylogenetic level.  
641 These analyses provided consistent support for the monophyly of Archaeplastida based  
642 on host markers, thus reconciling the evolutionary histories of plastids and hosts. This  
643 topology is compatible with the hypothesis of a single endosymbiotic origin of plastids  
644 in the Archaeplastida ancestor, establishing a firmer ground to better understand the  
645 early evolution in this important group of eukaryotes.

646

647 **Acknowledgements**

648

649 We are grateful to D. Baurain and M. Brown for providing access to original data, to A.  
650 Rokas and X-X. Shen for sharing code, and to S. Whelan for insightful discussions.  
651 This work was supported by a fellowship from Science for Life Laboratory to FB. II  
652 was in part supported by a Juan de la Cierva – Incorporación postdoctoral fellowship  
653 (IJCI-2016-29566) from the Spanish Ministry of Economy and Competitiveness  
654 (MINECO). Computations were performed on resources provided by the Swedish  
655 National Infrastructure for Computing (SNIC) at Uppsala Multidisciplinary Center for

656 Advanced Computational Science (UPPMAX) under projects SNIC 2017/7-151, SNIC  
657 2019/3-305, and SNIC 2020/15-38.

658

### 659 **Data availability**

660 The combined datasets and all phylogenetic trees are available from the Dryad Digital  
661 Repository: [http://dx.doi.org/10.5061/dryad.\[NNNN\]](http://dx.doi.org/10.5061/dryad.[NNNN])

662

### 663 **Contributions**

664 II and FB conceived the study; II and JFHS assembled datasets; II performed data  
665 analysis and wrote first draft; all authors contributed to the final text.

666

### 667 **References**

- 668 Adl S.M., Simpson A.G.B., Farmer M.A., Andersen R.A., Anderson O.R., Barta J.R.,  
669 Bowser S.S., Brugerolle G.U.Y., Fensome R.A., Fredericq S., James T.Y., Karpov  
670 S., Kugrens P., Krug J., Lane C.E., Lewis L.A., Lodge J., Lynn D.H., Mann D.G.,  
671 McCourt R.M., Mendoza L., Moestrup Øj., Mozley-Standridge S.E., Nerad T.A.,  
672 Shearer C.A., Smirnov A.V., Spiegel F.W., Taylor M.F.J.R. 2005. The new higher  
673 level classification of eukaryotes with emphasis on the taxonomy of protists. *J.*  
674 *Eukaryot. Microbiol.* 52:399–451.
- 675 Ali R.H., Bogusz M., Whelan S. 2019. Identifying clusters of high confidence  
676 homologies in multiple sequence alignments. *Mol. Biol. Evol.* 36:2340–2351.
- 677 Atkinson G.C., Baldauf S.L. 2010. Evolution of elongation factor G and the origins of  
678 mitochondrial and chloroplast forms. *Mol. Biol. Evol.* 28:1281–1292.
- 679 Baurain D., Brinkmann H., Petersen J., Rodríguez-Ezpeleta N., Stechmann A.,  
680 Demoulin V., Roger A.J., Burger G., Lang B.F., Philippe H. 2010. Phylogenomic  
681 evidence for separate acquisition of plastids in cryptophytes, haptophytes, and  
682 stramenopiles. *Mol. Biol. Evol.* 27:1698–1709.
- 683 Besendahl A., Qiu Y.-L., Lee J., Palmer J.D., Bhattacharya D. 2000. The cyanobacterial  
684 origin and vertical transmission of the plastid tRNA<sup>Leu</sup> group-I intron. *Curr. Genet.*  
685 37:12–23.
- 686 Bodył A., Stiller J.W., Mackiewicz P. 2009. Chromalveolate plastids: direct descent or  
687 multiple endosymbioses? *Trends Ecol. Evol.* 24:119–121.
- 688 Brown J.M., Thomson R.C. 2017. Bayes factors unmask highly variable information  
689 content, bias, and extreme influence in phylogenomic analyses. *Syst. Biol.* 66:517-  
690 530.
- 691 Brown M.W., Heiss A.A., Kamikawa R., Inagaki Y., Yabuki A., Tice A.K., Shiratori  
692 T., Ishida K.-I., Hashimoto T., Simpson A.G.B., Roger A.J. 2018. Phylogenomics



- 693 places orphan protistan lineages in a novel eukaryotic super-group. *Genome Biol.*  
694 *Evol.* 10:427–433.
- 695 Brown M.W., Sharpe S.C., Silberman J.D., Heiss A.A., Lang B.F., Simpson A.G.B.,  
696 Roger A.J. 2013. Phylogenomics demonstrates that breviate flagellates are related to  
697 opisthokonts and apusomonads. *Proc. R. Soc. B Biol. Sci.* 280:20131755.
- 698 Bryant D., Hahn M.W. 2020. The concatenation question. In: *Phylogenetics in the*  
699 *Genomic Era*. Authors open access book hal-02535070. p. 3.4:1–3.4:23.
- 700 Burki F., Flegontov P., Obornik M., Cihlar J., Pain A., Lukes J., Keeling P.J. 2012. Re-  
701 evaluating the green versus red signal in eukaryotes with secondary plastid of red  
702 algal origin. *Genome Biol. Evol.* 4:626–35.
- 703 Burki F., Inagaki Y., Bråte J., Archibald J.M., Keeling P.J., Cavalier-Smith T.,  
704 Sakaguchi M., Hashimoto T., Horak A., Kumar S., Klaveness D., Jakobsen K.S.,  
705 Pawlowski J., Shalchian-Tabrizi K. 2009. Large-scale phylogenomic analyses reveal  
706 that two enigmatic protist lineages, Telonemia and Centroheliozoa, are related to  
707 photosynthetic chromalveolates. *Genome Biol. Evol.* 1:231–238.
- 708 Burki F., Kaplan M., Tikhonenkov D.V., Zlatogursky V., Minh B.Q., Radaykina L.V.,  
709 Smirnov A., Mylnikov A.P., Keeling P.J. 2016. Untangling the early diversification  
710 of eukaryotes: A phylogenomic study of the evolutionary origins of Centrohelida,  
711 Haptophyta and Cryptista. *Proc. R. Soc. B Biol. Sci.* 283:20152802.
- 712 Burki F., Roger A.J., Brown M.W., Simpson A.G.B. 2020. The new tree of eukaryotes.  
713 *Trends Ecol. Evol.* 35:43–55.
- 714 Burki F., Shalchian-Tabrizi K., Minge M., Skjæveland Å., Nikolaev S.I., Jakobsen K.S.,  
715 Pawlowski J. 2007. Phylogenomics reshuffles the eukaryotic supergroups. *PLoS*  
716 *ONE.* 2:e790.
- 717 Cavalier-Smith T. 1998. A revised six-kingdom system of life. *Biol. Rev. Camb. Philos.*  
718 *Soc.* 73:203–266.
- 719 Cavalier-Smith T. 2000. Membrane heredity and early chloroplast evolution. *Trends*  
720 *Plant Sci.* 5:174–182.
- 721 Cerón-Romero M.A., Maurer-Alcalá X.X., Grattepanche J.-D., Yan Y., Fonseca M.M.,  
722 Katz L.A. 2019. PhyloToL: A taxon/gene-rich phylogenomic pipeline to explore  
723 genome evolution of diverse eukaryotes. *Mol. Biol. Evol.* 36:1831–1842.
- 724 Chen F., Mackey A.J., Stoeckert C.J., Roos D.S. 2006. OrthoMCL-DB: Querying a  
725 comprehensive multi-species collection of ortholog groups. *Nucleic Acids Res.*  
726 34:D363–D368.
- 727 Crisuolo A., Gribaldo S. 2010. BMGE (Block Mapping and Gathering with Entropy):  
728 A new software for selection of phylogenetic informative regions from multiple  
729 sequence alignments. *BMC Evol. Biol.* 10:210.
- 730 Crisuolo A., Gribaldo S. 2011. Large-scale phylogenomic analyses indicate a deep  
731 origin of primary plastids within cyanobacteria. *Mol. Biol. Evol.* 28:3019–32.
- 732 Dang T., Kishino H. 2019. Stochastic variational inference for Bayesian phylogenetics:  
733 A case of CAT model. *Mol. Biol. Evol.* 36:825–833.
- 734 Deschamps P., Moreira D. 2009. Signal conflicts in the phylogeny of the primary  
735 photosynthetic eukaryotes. *Mol. Biol. Evol.* 26:2745–2753.
- 736 Gawryluk R.M.R., Tikhonenkov D.V., Hehenberger E., Husnik F., Mylnikov A.P.,  
737 Keeling P.J. 2019. Non-photosynthetic predators are sister to red algae. *Nature.*  
738 572:240–243.
- 739 Gould S.B., Waller R.F., McFadden G.I. 2008. Plastid Evolution. *Annu. Rev. Plant*  
740 *Biol.* 59:491–517.
- 741 Hampl V., Hug L., Leigh J.W., Dacks J.B., Lang B.F., Simpson A.G.B., Roger A.J.  
742 2009. Phylogenomic analyses support the monophyly of Excavata and resolve



- 743 relationships among eukaryotic “supergroups.” *Proc. Natl. Acad. Sci. U. S. A.*  
744 106:3859–3864.
- 745 Hoang D.T., Chernomor O., von Haeseler A., Minh B.Q., Le S.V. 2017. UFBoot2:  
746 Improving the ultrafast bootstrap approximation. *Mol. Biol. Evol.* 35:518–522.
- 747 Huerta-Cepas J., Serra F., Bork P. 2016. ETE 3: Reconstruction, analysis, and  
748 visualization of phylogenomic data. *Mol. Biol. Evol.* 33:1635–1638.
- 749 Janouškovec J., Tikhonenkov D.V., Burki F., Howe A.T., Rohwer F.L., Mylnikov A.P.,  
750 Keeling P.J. 2017. A new lineage of eukaryotes illuminates early mitochondrial  
751 genome reduction. *Curr. Biol.* 27:1–8.
- 752 Kalyaanamoorthy S., Minh B.Q., Wong T.K.F., von Haeseler A., Jermin L.S. 2017.  
753 ModelFinder: Fast model selection for accurate phylogenetic estimates. *Nat.*  
754 *Methods.* 14: 587–589.
- 755 Kang S., Tice A.K., Spiegel F.W., Silberman J.D., Panek T., Cepicka I., Kostka M.,  
756 Kosakyan A., Alcantara D.M., Roger A.J., Shadwick L.L., Smirnov A., Kudryavstev  
757 A., Lahr D.J.G., Brown M.W. 2017. Between a pod and a hard test: the deep  
758 evolution of amoebae. *Mol. Biol. Evol.* 34:2258–2270.
- 759 Katoh K., Standley D.M. 2013. MAFFT multiple sequence alignment software version  
760 7: Improvements in performance and usability. *Mol. Biol. Evol.* 30:772–780.
- 761 Katoh K., Standley D.M. 2016. A simple method to control over-alignment in the  
762 MAFFT multiple sequence alignment program. *Bioinformatics.* 32:1933–1942.
- 763 Katz L.A., Grant J.R. 2015. Taxon-rich phylogenomic analyses resolve the eukaryotic  
764 tree of life and reveal the power of subsampling by sites. *Syst. Biol.* 64:406–415.
- 765 Keeling P.J., Burki F., Wilcox H.M., Allam B., Allen E.E., Amaral-Zettler L.A.,  
766 Armbrust E.V., Archibald J.M., Bharti A.K., Bell C.J., Beszteri B., Bidle K.D.,  
767 Cameron C.T., Campbell L., Caron D.A., Cattolico R.A., Collier J.L., Coyne K.,  
768 Davy S.K., Deschamps P., Dyhrman S.T., Edvardsen B., Gates R.D., Gobler C.J.,  
769 Greenwood S.J., Guida S.M., Jacobi J.L., Jakobsen K.S., James E.R., Jenkins B.,  
770 John U., Johnson M.D., Juhl A.R., Kamp A., Katz L.A., Kiene R., Kudryavtsev A.,  
771 Leander B.S., Lin S., Lovejoy C., Lynn D., Marchetti A., McManus G., Nedelcu  
772 A.M., Menden-Deuer S., Miceli C., Mock T., Montresor M., Moran M.A., Murray  
773 S., Nadathur G., Nagai S., Ngam P.B., Palenik B., Pawlowski J., Petroni G.,  
774 Piganeau G., Posewitz M.C., Rengefors K., Romano G., Rumpho M.E., Rynearson  
775 T., Schilling K.B., Schroeder D.C., Simpson A.G., Slamovits C.H., Smith D.R.,  
776 Smith G.J., Smith S.R., Sosik H.M., Stief P., Theriot E., Twary S.N., Umale P.E.,  
777 Vaultot D., Wawrik B., Wheeler G.L., Wilson W.H., Xu Y., Zingone A., Worden  
778 A.Z. 2014. The Marine Microbial Eukaryote Transcriptome Sequencing Project  
779 (MMETSP): illuminating the functional diversity of eukaryotic life in the oceans  
780 through transcriptome sequencing. *PLoS Biol.* 12:e1001889.
- 781 Kim E., Graham L.E. 2008. EEF2 analysis challenges the monophyly of Archaeplastida  
782 and Chromalveolata. *PLoS ONE.* 3:e2621.
- 783 Ku C., Nelson-Sathi S., Roettger M., Sousa F.L., Lockhart P.J., Bryant D., Hazkani-  
784 Covo E., McInerney J.O., Landan G., Martin W.F. 2015. Endosymbiotic origin and  
785 differential loss of eukaryotic genes. *Nature.* 524:427–432.
- 786 Kupczok A., Haeseler A.V., Klaere S. 2008. An exact algorithm for the geodesic  
787 distance between phylogenetic trees. *J. Comput. Biol.* 15:577–591.
- 788 Lang B.F., Nedelcu A.M. 2012. Plastid genomes of algae. In: Bock R., Knoop V.,  
789 editors. *Genomics of Chloroplasts and Mitochondria*. Dordrecht: Springer  
790 Netherlands. p. 59–87.

- 791 Lartillot N., Rodrigue N., Stubbs D., Richer J. 2013. PhyloBayes MPI: Phylogenetic  
792 reconstruction with infinite mixtures of profiles in a parallel environment. *Syst. Biol.*  
793 62:611–615.
- 794 Lax G., Eglit Y., Eme L., Bertrand E.M., Roger A.J., Simpson A.G.B. 2018.  
795 Hemimastigophora is a novel supra-kingdom-level lineage of eukaryotes. *Nature.*  
796 564:410–414.
- 797 Leebens-Mack J.H., Barker M.S., Carpenter E.J., Deyholos M.K., Gitzendanner M.A.,  
798 Graham S.W., Grosse I., Li Z., Melkonian M., Mirarab S., Porsch M., Quint M.,  
799 Rensing S.A., Soltis D.E., Soltis P.S., Stevenson D.W., Ullrich K.K., Wickett N.J.,  
800 DeGironimo L., Edger P.P., Jordon-Thaden I.E., Joya S., Liu T., Melkonian B.,  
801 Miles N.W., Pokorny L., Quigley C., Thomas P., Villarreal J.C., Augustin M.M.,  
802 Barrett M.D., Baucom R.S., Beerling D.J., Benstein R.M., Biffin E., Brockington  
803 S.F., Burge D.O., Burris J.N., Burris K.P., Burtet-Sarramegna V., Caicedo A.L.,  
804 Cannon S.B., Çebi Z., Chang Y., Chater C., Cheeseman J.M., Chen T., Clarke N.D.,  
805 Clayton H., Covshoff S., Crandall-Stotler B.J., Cross H., dePamphilis C.W., Der J.P.,  
806 Determann R., Dickson R.C., Di Stilio V.S., Ellis S., Fast E., Feja N., Field K.J.,  
807 Filatov D.A., Finnegan P.M., Floyd S.K., Fogliani B., García N., Gâteblé G., Godden  
808 G.T., Goh F. (Qi Y., Greiner S., Harkess A., Heaney J.M., Helliwell K.E., Heyduk  
809 K., Hibberd J.M., Hodel R.G.J., Hollingsworth P.M., Johnson M.T.J., Jost R., Joyce  
810 B., Kapralov M.V., Kazamia E., Kellogg E.A., Koch M.A., Von Konrat M., Könyves  
811 K., Kutchan T.M., Lam V., Larsson A., Leitch A.R., Lentz R., Li F.-W., Lowe A.J.,  
812 Ludwig M., Manos P.S., Mavrodiev E., McCormick M.K., McKain M., McLellan T.,  
813 McNeal J.R., Miller R.E., Nelson M.N., Peng Y., Ralph P., Real D., Riggins C.W.,  
814 Ruhsam M., Sage R.F., Sakai A.K., Scascitella M., Schilling E.E., Schösser E.-M.,  
815 Sederoff H., Servick S., Sessa E.B., Shaw A.J., Shaw S.W., Sigel E.M., Skema C.,  
816 Smith A.G., Smithson A., Stewart C.N., Stinchcombe J.R., Szövényi P., Tate J.A.,  
817 Tiebel H., Trapnell D., Villegente M., Wang C.-N., Weller S.G., Wenzel M.,  
818 Weststrand S., Westwood J.H., Whigham D.F., Wu S., Wulff A.S., Yang Y., Zhu D.,  
819 Zhuang C., Zuidof J., Chase M.W., Pires J.C., Rothfels C.J., Yu J., Chen C., Chen L.,  
820 Cheng S., Li J., Li R., Li X., Lu H., Ou Y., Sun X., Tan X., Tang J., Tian Z., Wang  
821 F., Wang J., Wei X., Xu X., Yan Z., Yang F., Zhong X., Zhou F., Zhu Y., Zhang Y.,  
822 Ayyampalayam S., Barkman T.J., Nguyen N., Matasci N., Nelson D.R., Sayyari E.,  
823 Wafula E.K., Walls R.L., Warnow T., An H., Arrigo N., Baniaga A.E., Galuska S.,  
824 Jorgensen S.A., Kidder T.I., Kong H., Lu-Irving P., Marx H.E., Qi X., Reardon C.R.,  
825 Sutherland B.L., Tiley G.P., Welles S.R., Yu R., Zhan S., Gramzow L., Theißen G.,  
826 Wong G.K.-S., One Thousand Plant Transcriptomes Initiative. 2019. One thousand  
827 plant transcriptomes and the phylogenomics of green plants. *Nature.* 574:679–685.
- 828 Löffelhardt W. 2014. The single primary endosymbiotic event. In: Löffelhardt W.,  
829 editor. *Endosymbiosis*. Vienna: Springer Vienna. p. 39–52.
- 830 Mackiewicz P., Gagat P. 2014. Monophyly of Archaeplastida supergroup and  
831 relationships among its lineages in the light of phylogenetic and phylogenomic  
832 studies. Are we close to a consensus? *Acta Soc. Bot. Pol.* 83:263–280.
- 833 Marcussen T., Sandve S.R., Heier L., Spannagl M., Pfeifer M., Jakobsen K.S., Wulff  
834 B.B.H., Steuernagel B., Mayer K.F.X., Olsen O.-A., Rogers J., Doležel J., Pozniak  
835 C., Eversole K., Feuillet C., Gill B., Friebe B., Lukaszewski A.J., Sourdille P., Endo  
836 T.R., Kubaláková M., Číhalíková J., Dubská Z., Vrána J., Šperková R., Šimková H.,  
837 Febrer M., Clissold L., McLay K., Singh K., Chhuneja P., Singh N.K., Khurana J.,  
838 Akhunov E., Choulet F., Alberti A., Barbe V., Wincker P., Kanamori H., Kobayashi  
839 F., Itoh T., Matsumoto T., Sakai H., Tanaka T., Wu J., Ogihara Y., Handa H.,  
840 Maclachlan P.R., Sharpe A., Klassen D., Edwards D., Batley J., Lien S., Caccamo

- 841 M., Ayling S., Ramirez-Gonzalez R.H., Clavijo B.J., Wright J., Martis M.M.,  
842 Mascher M., Chapman J., Poland J.A., Scholz U., Barry K., Waugh R., Rokhsar  
843 D.S., Muehlbauer G.J., Stein N., Gundlach H., Zytnecki M., Jamilloux V.,  
844 Quesneville H., Wicker T., Faccioli P., Colaiacovo M., Stanca A.M., Budak H.,  
845 Cattivelli L., Glover N., Pingault L., Paux E., Sharma S., Appels R., Bellgard M.,  
846 Chapman B., Nussbaumer T., Bader K.C., Rimbart H., Wang S., Knox R., Kilian A.,  
847 Alaux M., Alfama F., Couderc L., Guilhot N., Viseux C., Loaec M., Keller B., Praud  
848 S. 2014. Ancient hybridizations among the ancestral genomes of bread wheat.  
849 *Science*. 345:1250092.
- 850 Nguyen L.-T., Schmidt H.A., von Haeseler A., Minh B.Q. 2015. IQ-TREE: A fast and  
851 effective stochastic algorithm for estimating maximum-likelihood phylogenies. *Mol.*  
852 *Biol. Evol.* 32:268–274.
- 853 Parfrey L.W., Grant J., Tekle Y.I., Lasek-Nesselquist E., Morrison H.G., Sogin M.L.,  
854 Patterson D.J., Katz L.A. 2010. Broadly sampled multigene analyses yield a well-  
855 resolved eukaryotic tree of life. *Syst. Biol.* 59:518–533.
- 856 Philippe H., Roure B. 2011. Difficult phylogenetic questions: More data, maybe; better  
857 methods, certainly. *BMC Biol.* 9:91.
- 858 Ponce-Toledo R.I., Deschamps P., López-García P., Zivanovic Y., Benzerara K.,  
859 Moreira D. 2017. An early-branching freshwater cyanobacterium at the origin of  
860 plastids. *Curr. Biol.* 27:386–391.
- 861 Price D.C., Goodenough U.W., Roth R., Lee J.-H., Kariyawasam T., Mutwil M., Ferrari  
862 C., Facchinelli F., Ball S.G., Cenci U., Chan C.X., Wagner N.E., Yoon H.S., Weber  
863 A.P.M., Bhattacharya D. 2019. Analysis of an improved *Cyanophora paradoxa*  
864 genome assembly. *DNA Res.* 26:287–299.
- 865 Price M.N., Dehal P.S., Arkin A.P. 2010. FastTree 2 – Approximately maximum-  
866 likelihood trees for large alignments. *PLOS ONE*. 5:e9490.
- 867 Reeb V.C., Peglar M.T., Yoon H.S., Bai J.R., Wu M., Shiu P., Grafenberg J.L., Reyes-  
868 Prieto A., Rümmele S.E., Gross J., Bhattacharya D. 2009. Interrelationships of  
869 chromalveolates within a broadly sampled tree of photosynthetic protists. *Mol.*  
870 *Phylogenet. Evol.* 53:202–211.
- 871 Reyes-Prieto A., Bhattacharya D. 2007. Phylogeny of Calvin cycle enzymes supports  
872 Plantae monophyly. *Mol. Phylogenet. Evol.* 45:384–391.
- 873 Reyes-Prieto A., Russell S., Figueroa-Martinez F., Jackson C. 2018. Chapter Four -  
874 Comparative plastid genomics of glaucophytes. In: Chaw S.-M., Jansen R.K.,  
875 editors. *Advances in Botanical Research*. Academic Press. p. 95–127.
- 876 Reyes-Prieto A., Weber A.P.M., Bhattacharya D. 2007. The origin and establishment of  
877 the plastid in algae and plants. *Annu. Rev. Genet.* 41:147–168.
- 878 Richter D.J., Berney C., Strasser J.F.H., Burki F., Vargas C. de. 2020. EukProt: a  
879 database of genome-scale predicted proteins across the diversity of eukaryotic life.  
880 *bioRxiv*.:2020.06.30.180687.
- 881 Rodríguez-Ezpeleta N., Brinkmann H., Burey S.C., Roure B., Burger G., Löffelhardt  
882 W., Bohnert H.J., Philippe H., Lang B.F. 2005. Monophyly of primary  
883 photosynthetic eukaryotes: green plants, red algae, and glaucophytes. *Curr. Biol.*  
884 15:1325–1330.
- 885 Rodríguez-Ezpeleta N., Brinkmann H., Burger G., Roger A.J., Gray M.W., Philippe H.,  
886 Lang B.F. 2007a. Toward resolving the eukaryotic tree: The phylogenetic positions  
887 of jakobids and cercozoans. *Curr. Biol.* 17:1420–1425.
- 888 Rodríguez-Ezpeleta N., Brinkmann H., Roure B., Lartillot N., Lang F.B., Philippe H.  
889 2007b. Detecting and overcoming systematic errors in genome-scale phylogenies.  
890 *Syst. Biol.* 56:389–399.

- 891 Rogers M.B., Gilson P.R., Su V., McFadden G.I., Keeling P.J. 2007. The complete  
892 chloroplast genome of the chlorarachniophyte *Bigeloviella natans*: evidence for  
893 independent origins of chlorarachniophyte and euglenid secondary endosymbionts.  
894 *Mol. Biol. Evol.* 24:54–62.
- 895 Roure B., Rodriguez-Ezpeleta N., Philippe H. 2007. SCAFoS: A tool for selection,  
896 concatenation and fusion of sequences for phylogenomics. *BMC Evol. Biol.* 7:S2.
- 897 Sánchez-Baracaldo P., Raven J.A., Pisani D., Knoll A.H. 2017. Early photosynthetic  
898 eukaryotes inhabited low-salinity habitats. *Proc. Natl. Acad. Sci. U. S. A.*
- 899 Schrepf D., Lartillot N., Szöllösi G. 2020. Scalable empirical mixture models that  
900 account for across-site compositional heterogeneity. .
- 901 Shen X.-X., Hittinger C.T., Rokas A. 2017. Contentious relationships in phylogenomic  
902 studies can be driven by a handful of genes. *Nat. Ecol. Evol.* 1:126.
- 903 Siu-Ting K., Torres-Sánchez M., San Mauro D., Wilcockson D., Wilkinson M., Pisani  
904 D., O’Connell M.J., Creevey C.J. 2019. Inadvertent paralog inclusion drives  
905 artifactual topologies and timetree estimates in phylogenomics. *Mol. Biol. Evol.*  
906 36:1344–1356.
- 907 Stamatakis A. 2014. RAxML version 8: A tool for phylogenetic analysis and post-  
908 analysis of large phylogenies. *Bioinformatics.* 30:1312–1313.
- 909 Stiller J.W. 2014. Toward an empirical framework for interpreting plastid evolution. *J.*  
910 *Phycol.* 50:462–471.
- 911 Stoebe B., Kowallik K.V. 1999. Gene-cluster analysis in chloroplast genomics. *Trends*  
912 *Genet.* 15:344–347.
- 913 Strasser J.F.H., Jamy M., Mylnikov A.P., Tikhonenkov D.V., Burki F. 2019. New  
914 phylogenomic analysis of the enigmatic phylum *Telonemia* further resolves the  
915 eukaryote tree of life. *Mol. Biol. Evol.*
- 916 Takahashi F., Okabe Y., Nakada T., Sekimoto H., Ito M., Kataoka H., Nozaki H. 2007.  
917 Origins of the secondary plastids of Euglenophyta and Chlorarachniophyta as  
918 revealed by an analysis of the plastid-targeting, nuclear-encoded gene *psbO1*. *J.*  
919 *Phycol.* 43:1302–1309.
- 920 Tan G., Muffato M., Ledergerber C., Herrero J., Goldman N., Gil M., Dessimoz C.  
921 2015. Current methods for automated filtering of multiple sequence alignments  
922 frequently worsen single-gene phylogenetic inference. *Syst. Biol.* 64:778–91.
- 923 Venables W.N., Ripley B.D. 2002. *Modern Applied Statistics with S*, 4th ed. Springer.
- 924 Walker J.F., Shen X.-X., Rokas A., Smith S.A., Moyroud E. 2020. Disentangling  
925 biological and analytical factors that give rise to outlier genes in phylogenomic  
926 matrices. *bioRxiv*.:2020.04.20.049999.
- 927 Wang H.-C., Minh B.Q., Susko E., Roger A.J. 2018. Modeling site heterogeneity with  
928 posterior mean site frequency profiles accelerates accurate phylogenomic estimation.  
929 *Syst. Biol.* 67:216–235.
- 930 Whelan S., Irisarri I., Burki F. 2018. PREQUAL: detecting non-homologous characters  
931 in sets of unaligned homologous sequences. *Bioinformatics.* 34:3929–3930.
- 932 Wong T.K., Kalyaanamoorthy S., Meusemann K., Yeates D., Misof B., Jermini L.  
933 2014. AliStat version 1.3. CSIRO.
- 934 Wong T.K.F., Kalyaanamoorthy S., Meusemann K., Yeates D.K., Misof B., Jermini  
935 L.S. 2020. A minimum reporting standard for multiple sequence alignments. *NAR*  
936 *Genomics Bioinforma.* 2.
- 937 Yabuki A., Kamikawa R., Ishikawa S.A., Kolisko M., Kim E., Tanabe A.S., Kume K.,  
938 Ishida K., Inagaki Y. 2014. *Palpitomonas bilix* represents a basal cryptist lineage:  
939 insight into the character evolution in Cryptista. *Sci. Rep.* 4:4641.
